# Supplementary material
Source: Springer Nature journal article supplement (https://www.springermedizin.de/resource/supplementary/12916_2008_156_MOESM1_ESM.pdf/9599284)

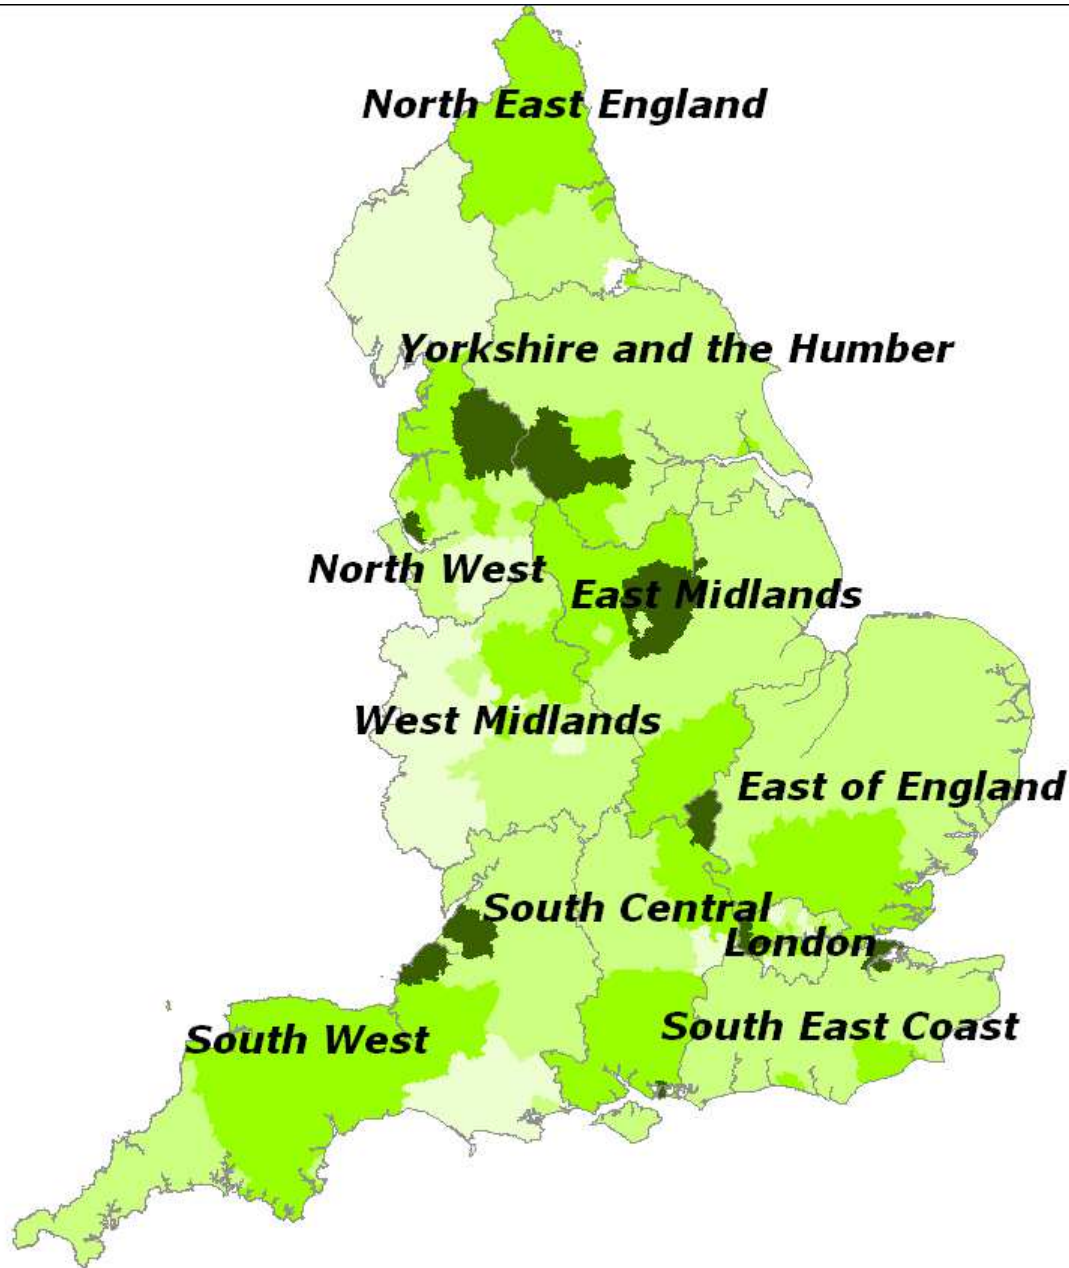

□ Strategic Health Authority  
Annual call rate per 1,000 population

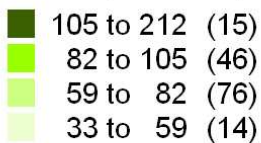

Supplement: MOESM1 [file 9599284]
